# Supplementary material
Source: HighWire-hosted journal article supplement (https://thorax.bmj.com/content/thoraxjnl-2018-211909)
Supplement: inline-supplementary-material-1 [file inline-supplementary-material-1.pdf]

## Supplementary materials – additional study details

|                                | Number of Children (Completed) | Design                        | Setting            | School Setting          | Direct Recipients                        | Programme (information on usual care or placebo conditions in brackets)                      | Intensity                                    | (Main) Deliverer                  | Contributes Information for Meta-analysis of Primary Outcomes | Additional information on outcomes                                                                                                                                             | Longest follow-up              |
|--------------------------------|--------------------------------|-------------------------------|--------------------|-------------------------|------------------------------------------|----------------------------------------------------------------------------------------------|----------------------------------------------|-----------------------------------|---------------------------------------------------------------|--------------------------------------------------------------------------------------------------------------------------------------------------------------------------------|--------------------------------|
| Al-Sheyab 2012 <sup>33</sup>   | 244                            | RCT (cluster randomised)      | Jordan             | 4 public high schools   | Children                                 | Triple A (no additional information provided on usual care conditions)                       | 3 Lessons                                    | Peers                             |                                                               | Quality of Life and Withdrawal included in secondary meta-analyses in <sup>11</sup>                                                                                            | Three months post-intervention |
| Atherly 2009 <sup>30</sup>     | 458                            | RCT (cluster randomised)      | USA                | Junior and High schools | Children                                 | Power Breathing (no additional information provided on usual care conditions)                | 3x 90 min lessons                            | Unclear                           | Hospitalisations; ED visits                                   |                                                                                                                                                                                | Three months post-intervention |
| Bartholomew 2006 <sup>34</sup> | 503                            | RCT (cluster randomised)      | Texas, USA         | Elementary schools      | Children; care providers; parents/carers | Multicomponent intervention (no additional information provided on usual care conditions)    | Unclear                                      | Computer programme; school nurses |                                                               | Withdrawal included in secondary meta-analyses in <sup>11</sup> ; Additional outcomes collected including on hospitalisation and absence but not extractable for meta-analyses | Unclear                        |
| Bruzzese 2004 <sup>35</sup>    | 45                             | RCT (individually randomised) | USA                | 2 public high schools   | Children                                 | OAS; Academic detailing (no additional information provided on usual care conditions)        | 3x lessons                                   | Trained health educator           |                                                               | Outcomes collected included student satisfaction and perceived utility of intervention                                                                                         | Post-test                      |
| Bruzzese 2008 <sup>36</sup>    | 23 students; 18 caregivers     | RCT (cluster randomised)      | New York City, USA | 1 middle school         | Children; caregivers                     | OAS; ASMA; Caregiver education (no additional information provided on usual care conditions) | 6x lessons                                   | Developmental psychologist        |                                                               | Day and night-time symptoms included in secondary meta-analyses in <sup>11</sup>                                                                                               | Two-months post-intervention   |
| Bruzzese 2010 <sup>60</sup>    | 288                            | RCT (individually randomised) | New York City, USA | 25 public schools       | Children; caregivers                     | Asthma: It's a Family Affair (no additional information provided on                          | Children: 6x lessons; Caregivers: 5x lessons | Unclear                           |                                                               | Additional outcomes collected including on hospitalisation                                                                                                                     | One year post-intervention     |

|                             |                        |                               |                 |                                |                                                 |                                                                                                  |                                                 |                                             |                                                                       |                                                                                                                                                                                                                    |                                            |
|-----------------------------|------------------------|-------------------------------|-----------------|--------------------------------|-------------------------------------------------|--------------------------------------------------------------------------------------------------|-------------------------------------------------|---------------------------------------------|-----------------------------------------------------------------------|--------------------------------------------------------------------------------------------------------------------------------------------------------------------------------------------------------------------|--------------------------------------------|
|                             |                        |                               |                 |                                |                                                 | usual care conditions)                                                                           |                                                 |                                             |                                                                       | and ED visits but not extractable                                                                                                                                                                                  |                                            |
| Bruzzese 2011 <sup>25</sup> | 281                    | RCT (individually randomised) | New York, USA   | 5 high schools                 | Children                                        | ASMA (no additional information provided on wait-list conditions)                                | 3x group sessions; individual coaching sessions | Health educators                            | Hospitalisations; ED visits; school absence; restricted activity days |                                                                                                                                                                                                                    | One year post-intervention                 |
| Cicutto 2005 <sup>38</sup>  | 244                    | RCT (cluster randomised)      | Toronto, Canada | 26 elementary schools          | Children                                        | Roaring Adventures of Puff (no additional information provided on usual care conditions)         | 6x lessons                                      | Asthma educator                             | Hospitalisations; ED visits; school absence; restricted activity days |                                                                                                                                                                                                                    | One year post-intervention                 |
| Cicutto 2013 <sup>39</sup>  | 1172                   | RCT (cluster randomised)      | Canada          | 170 primary/elementary schools | Children; families                              | Roaring Adventures of Puff (no additional information provided on usual care conditions)         | 6x lessons                                      | Public health nurses                        | ED visits; school absence; restricted activity days                   | Quality of Life and Withdrawal included in secondary meta-analyses in <sup>11</sup>                                                                                                                                | One year post-intervention                 |
| Clark 2004 <sup>40</sup>    | 835                    | RCT (cluster randomised)      | Detroit, USA    | 14 public high schools         | Children; parents; classmates; school personnel | OAS; control strategies for schools (no additional information provided on wait-list conditions) | 6x lessons and 2x classroom sessions            | Unclear                                     |                                                                       | School absence and day and night time symptoms were collected but not extractable for meta-analyses                                                                                                                |                                            |
| Clark 2005 <sup>41</sup>    | 543                    | RCT (cluster randomised)      | Beijing, China  | 21 elementary schools          | Children                                        | OAS (no additional information provided on usual care conditions)                                | 5x lessons                                      | Teachers                                    | Hospitalisations; ED visits                                           | Quality of Life data were collected but not extractable for meta-analyses                                                                                                                                          | 24 months post-intervention                |
| Clark 2010 <sup>42</sup>    | 921                    | RCT (cluster randomised)      | Detroit, USA    | 19 middle schools              | Children                                        | OAS; peer component                                                                              | 6x lessons                                      | Graduate students; community leaders; peers |                                                                       | Health related quality of life and experience of daytime and night-time symptoms were collected in the study but necessary data were not presented that could allow for extraction and inclusion in meta-analysis. | 24 months post-intervention                |
| Gerald 2006 <sup>43</sup>   | Unclear (736 enrolled) | RCT (individually randomised) | USA             | 54 elementary schools          | Children                                        | OAS (no additional information provided on                                                       | 6x lessons                                      | Teachers; study personnel                   | Hospitalisations; ED visits; school absence                           |                                                                                                                                                                                                                    | Post-test (immediately after intervention) |

|                            |                         |                               |                      |                        |                    |                                                                                                          |                                                      |                              |                                                                                                     |                                                                                                               |                                          |
|----------------------------|-------------------------|-------------------------------|----------------------|------------------------|--------------------|----------------------------------------------------------------------------------------------------------|------------------------------------------------------|------------------------------|-----------------------------------------------------------------------------------------------------|---------------------------------------------------------------------------------------------------------------|------------------------------------------|
|                            |                         |                               |                      |                        |                    | wait-list conditions)                                                                                    |                                                      |                              |                                                                                                     |                                                                                                               |                                          |
| Gerald 2009 <sup>26</sup>  | 240                     | RCT (individually randomised) | USA                  | Unclear                | Children           | Asthma education (no additional information provided on usual care conditions)                           | 1x lesson; multiple supervisions                     | Study personnel              | School absence                                                                                      | Lung function, use of reliever therapies, and withdrawal included in secondary meta-analyses in <sup>11</sup> | One year post-intervention               |
| Henry 2004 <sup>44</sup>   | Unclear (4475 eligible) | RCT (cluster randomised)      | Australia            | Secondary schools      | Children           | Asthma education (no additional information provided on usual care conditions)                           | 3x lessons                                           | Teachers                     |                                                                                                     | Health related quality of life included in secondary meta-analyses in <sup>11</sup>                           | Approximately 6 months post-intervention |
| Horner 2008 <sup>31</sup>  | 163                     | RCT (cluster randomised)      | USA                  | 18 elementary schools  | Children           | Asthma self-management (placebo intervention – intervention on other health promotion topic provided)    | 16x lessons                                          | Lay health educators         | Hospitalisations                                                                                    | Withdrawal included in secondary meta-analyses in <sup>11</sup>                                               | Post-test                                |
| Horner 2015 <sup>45</sup>  | 84                      | RCT (cluster randomised)      | Texas, USA           | 3 elementary schools   | Children           | 7-topic curriculum (placebo intervention – intervention on other health promotion topic provided)        | 16x lessons                                          | Trained lay health educators | Hospitalisations; ED visits                                                                         | Withdrawal included in secondary meta-analyses in <sup>11</sup>                                               | 10 months post-intervention              |
| Howell 2005 <sup>46</sup>  | 25 families             | RCT (cluster randomised)      | New York, USA        | 4 elementary schools   | Children; families | Quest for the Code (no additional information provided on usual care conditions)                         | 30 minute session                                    | Computer programme           | ED visits; experience of day and night time symptoms; HRQoL; School absences; Corticosteroid dosage |                                                                                                               | Three months post-test                   |
| Kintner 2009 <sup>47</sup> | 59                      | RCT (cluster randomised)      | Michigan, USA        | 5 schools              | Children           | SHARP (no additional information provided on usual care conditions)                                      | 10x lessons                                          | Unclear                      |                                                                                                     | Health related quality of life included in secondary meta-analyses in <sup>11</sup>                           | Twelve months post-intervention          |
| Levy 2006 <sup>48</sup>    | 162                     | RCT (cluster randomised)      | Memphis City, USA    | 14 elementary schools  | Children           | OAS; monitoring of students' health status (no additional information provided on usual care conditions) | Weekly group sessions and weekly individual sessions | School-based nurses          | Hospitalisations; ED visits                                                                         |                                                                                                               | Post-test                                |
| McCann 2006 <sup>19</sup>  | 193                     | RCT (cluster randomised)      | South of England, UK | Primary/junior schools | Children; parents  | Education; role play (placebo)                                                                           | 1x workshop                                          | School nurse                 |                                                                                                     | Outcomes were not presented in                                                                                | Six months post-intervention             |

|                                  |                          |                               |                |                       |                             |                                                                                                 |                                          |                                                    |                                                                                        |                                                                                        |                                            |
|----------------------------------|--------------------------|-------------------------------|----------------|-----------------------|-----------------------------|-------------------------------------------------------------------------------------------------|------------------------------------------|----------------------------------------------------|----------------------------------------------------------------------------------------|----------------------------------------------------------------------------------------|--------------------------------------------|
|                                  |                          |                               |                |                       |                             | control workshop not on asthma self-management)                                                 |                                          |                                                    |                                                                                        | an extractable format. The outcome data was not disaggregated for asthmatic children   |                                            |
| McGhan 2003 <sup>49</sup>        | 136                      | RCT (cluster randomised)      | Canada         | 18 elementary schools | Children                    | Roaring Adventures of Puff (no additional information provided on usual care conditions)        | 6x lessons                               | Nursing and pharmacy students                      | ED visits; school absence                                                              |                                                                                        | Nine months post-intervention              |
| McGhan 2010 <sup>50</sup>        | 136                      | RCT (cluster randomised)      | Canada         | Elementary schools    | Children; parents; teachers | Roaring Adventures of Puff (no additional information provided on usual care conditions)        | 6x lessons                               | 3 <sup>rd</sup> year nursing and pharmacy students | ED visits; school absence; Unplanned GP or hospital visit; Day and night time symptoms |                                                                                        | Twelve months post-intervention            |
| Monforte 2012 <sup>51</sup>      | 90                       | RCT (cluster randomised)      | USA            | 8 elementary schools  | Children                    | OAS (no additional information provided on usual care conditions)                               | Unclear                                  | Unclear                                            | Health-related quality of life                                                         | This study was presented as an abstract only, therefore no data could be extracted     | Unclear                                    |
| Mosnaim 2011 <sup>51</sup>       | Unclear (536 randomised) | RCT (cluster randomised)      | Chicago, USA   | Elementary schools    | Children                    | One-to-one training (no additional information provided on usual care conditions)               | 4x sessions                              | Certified asthma educators                         |                                                                                        | None of the outcomes measured in the study matched the outcomes in the review protocol | Post-test (immediately after intervention) |
| Patterson 2005 <sup>52</sup>     | 191                      | RCT (cluster randomised)      | Belfast, UK    | Primary schools       | Children                    | SCAMP (no additional information provided on wait list conditions)                              | 8x sessions                              | School nurse and health visitor                    |                                                                                        | Quality of Life and Withdrawal included in secondary meta-analyses in <sup>11</sup>    | Two months post-intervention               |
| Persaud 1996 <sup>53</sup>       | 36                       | RCT (individually randomised) | Texas, USA     | 10 schools            | Children                    | Individualised education sessions (no additional information provided on usual care conditions) | 3x lessons and weekly education sessions | School nurse                                       | ED visits; school absence                                                              |                                                                                        | Twenty weeks post-intervention             |
| Praena-Crespo 2010 <sup>54</sup> | 3550                     | RCT (cluster randomised)      | Spain          | 16 high schools       | Children                    | Asthma programme (no additional information provided on control conditions)                     | 3x lessons                               | Teachers                                           |                                                                                        | This study was presented as an abstract only, therefore no data could be extracted     | 5-6 months post-intervention               |
| Pulcini                          | Unclear (40)             | RCT (cluster)                 | Massachusetts, | Middle schools        | Children                    | Peak flow                                                                                       | Daily for 2                              | Unclear                                            |                                                                                        | Asthma action                                                                          | Unclear                                    |

|                                     |                                   |                               |                  |                      |          |                                                                                                                     |                                             |                                            |                                                                          |                                                                                                                                                                 |                                 |
|-------------------------------------|-----------------------------------|-------------------------------|------------------|----------------------|----------|---------------------------------------------------------------------------------------------------------------------|---------------------------------------------|--------------------------------------------|--------------------------------------------------------------------------|-----------------------------------------------------------------------------------------------------------------------------------------------------------------|---------------------------------|
| 2007 <sup>55</sup>                  | randomised)                       | randomised)                   | USA              |                      |          | education (School nurses in the control group continued to use standard procedure of requesting an AAP via parents) | weeks                                       |                                            |                                                                          | plans are important, however they did not fit with the outcomes of this review therefore data could not be extracted                                            |                                 |
| Shah 2001 <sup>56</sup>             | 251                               | RCT (cluster randomised)      | Australia        | High schools         | Children | Triple-A: Asthma education and empowerment (no additional information provided on wait list conditions)             | 3x sessions                                 | Peers                                      |                                                                          | Quality of Life; Experience of day and night time symptoms; Lung function included in secondary meta-analyses in <sup>11</sup>                                  | Six months                      |
| Splett 2006 <sup>57</sup>           | Unclear (1561 schools randomised) | RCT (cluster randomised)      | Minneapolis, USA | K-8 schools          | Children | Training for school staff with some student education (no additional information provided on usual care conditions) | Unclear                                     | School nurse                               | School absence; unplanned visit to hospital or GP due to asthma symptoms |                                                                                                                                                                 | Post-test                       |
| Srof 2012 <sup>58</sup>             | 39                                | RCT (individually randomised) | Midwestern USA   | High schools         | Children | Asthma diary and 5x coping skills sessions (no additional information provided on usual care conditions)            | Sessions over 5 weeks                       | Principal Investigator                     |                                                                          | Outcomes were not presented in an extractable format; Data on overall quality of life were not presented in full; Sub-domains of quality of life only available | 6 weeks post-intervention       |
| Velsor-Friedrich 2005 <sup>59</sup> | 52                                | RCT (cluster randomised)      | USA              | 4 elementary schools | Children | OAS; nurse practitioner visits (no additional information provided on wait list conditions)                         | 6x group sessions; individual nurse session | Principal investigator; Nurse practitioner | ED visits                                                                | Experience of day time symptoms; Lung function included in secondary meta-analyses in <sup>11</sup>                                                             | Twelve months post-intervention |

## Supplementary materials – excluded references

The records below represent studies excluded after obtaining and screening the study based on its full text for eligibility as an outcome evaluation (not including records tagged as duplicates).

| Study          | Primary Reference                                                                                                                                                                                                                                                             | Reason for exclusion                                                                                                                                                                                  |
|----------------|-------------------------------------------------------------------------------------------------------------------------------------------------------------------------------------------------------------------------------------------------------------------------------|-------------------------------------------------------------------------------------------------------------------------------------------------------------------------------------------------------|
| Al-Sheyab 2015 | AL-SHEYAB, N., ALOMARI, M., SHAH, S. & GALLAGHER, R. 2015. 'Class smoke-free' pledge impacts on nicotine dependence in male adolescents: A cluster randomized controlled trial. <i>Tropical medicine and International Health</i> , 20, 255-256                               | Considered for outcome evaluation: Excluded on comparison (tested the effect of TAJ-Plus versus TAJ)                                                                                                  |
| Augustin 2003  | AUGUSTIN, J. 2003. <i>An intensive asthma intervention in a school-based clinic [Dissertation]</i> , Rush University.                                                                                                                                                         | Considered for outcome evaluation: Excluded on comparison: The intervention group received weekly workshops for 6 weeks, the control group standard educational materials on asthma management.       |
| Becker 2003    | BECKER, A. B., WHITTERS, D., GILLESPIE, C. A., FILUK, S. E., MCCOLM, J. E., THOMAS, N. J. & ET, A. L. 2003. Impact of a randomized asthma education program on asthma control in children [Abstract]. <i>Journal of Asthma and Clinical Immunology</i> , 111, S212-S212.      | Considered for outcome evaluation: Not school based                                                                                                                                                   |
| Bignall 2015a  | BIGNALL, W. J., LUBERTO, C. M., CORNETTE A, F., HAJ-HAMED, M. & COTTON, S. 2015. Breathing retraining for African-American adolescents with asthma: a pilot study of a school-based randomized controlled trial. <i>Journal of Asthma</i> , 52, 889-896.                      | Considered for outcome evaluation: Excluded as comparison received an intervention (the intervention group (20-min breathing retraining plus education) or control group (20-min standard education)) |
| Bowen 2013     | BOWEN, F. 2013. Asthma education and health outcomes of children aged 8 to 12 years. <i>Clinical Nursing Research</i> , 22, 172-185.                                                                                                                                          | Considered for outcome evaluation: Not school-based                                                                                                                                                   |
| Bruzzese 2006  | BRUZZESE, J. M., EVANS, D., WIESEMANN, S., PINKETT-HELLER, M., LEVISON, M. J., DU, Y. & ET, A. L. 2006. Using school staff to establish a preventive network of care to improve elementary school students' control of asthma. <i>Journal of School Health</i> , 76, 307-312. | Considered for outcome evaluation: Excluded as focused on family-level self-management, rather than children self-management                                                                          |
| Bruzzese 2011a | BRUZZESE, J. M., MARKMAN, L. B., APPEL, D. & WEBBER, M. 2001. An evaluation of Open Airways for Schools: using college students as instructors. <i>Journal of Asthma</i> , 38, 337-342.                                                                                       | Considered for outcome evaluation: Unclear whether asthmatic students (with diagnosed asthma) were included.                                                                                          |
| Burkhart 2003  | BURKHART, P. V. & WARD, H. J. 2003. Children's self-reports of characteristics of their asthma episodes. <i>Journal of Asthma</i> , 40, 909-916.                                                                                                                              | Considered for outcome evaluation: Large number of children under five (mean age under 5)                                                                                                             |
| Bush 2014      | BUSH, J. S., WALLER, J. L., OWNBY, D. R. & TINGEN, M. S. 2014. Do parents influence health literacy and impact asthma self-management in rural Georgia high school students? <i>Annals of Allergy, Asthma and Immunology</i> , 113, A20-A20.                                  | Considered for outcome evaluation: Not an intervention study (observational design)                                                                                                                   |
| Butz 2005      | BUTZ, A., PHAM, L., LEWIS, L., LEWIS, C., HILL, K., WALKER, J. & ET, A. L. 2005. Rural children with asthma: Impact of a parent and child asthma education program. <i>Journal of Asthma</i> , 42, 813-821.                                                                   | Considered for outcome evaluation: Excluded on comparison: Usual care not provided to comparison group                                                                                                |
| Clark 1986     | CLARK, N. M. 2003. School-based approaches to help pre-teens manage asthma. <i>CRISP (Computer Retrieval of Information on Scientific Projects)</i> , 31/01/2008 End date, 1-2.                                                                                               | Considered for outcome evaluation: Published before cut-off point                                                                                                                                     |
| Clark 2003     | CLARK, N. M., FELDMAN, C. H., EVANS, D., DUZEY, O.,                                                                                                                                                                                                                           | Considered for outcome evaluation:                                                                                                                                                                    |

|                 |                                                                                                                                                                                                                                                                                                                                                          |                                                                                                                                                                                                              |
|-----------------|----------------------------------------------------------------------------------------------------------------------------------------------------------------------------------------------------------------------------------------------------------------------------------------------------------------------------------------------------------|--------------------------------------------------------------------------------------------------------------------------------------------------------------------------------------------------------------|
|                 | LEVISON, M. J., WASILEWSKI, Y. & ET, A. L. 1986. Managing better: Children, parents, and asthma. <i>Patient Education and Counseling</i> , 8, 27-38.                                                                                                                                                                                                     | Duplicate (on manual screening)                                                                                                                                                                              |
| Coté 1997       | COTÉ, J., CARTIER, A., ROBICHAUD, P., BOUTIN, H., MALO, J. L., ROULEAU, M. & ET, A. L. 1997. Influence on asthma morbidity of asthma education programs based on self-management plans following treatment optimization. <i>American Journal of Respiratory and Critical Care Medicine</i> , 155, 1509-1514.                                             | Considered for outcome evaluation: Not school based                                                                                                                                                          |
| Eakin 2012      | EAKIN, M. N., RAND, C. S., BILDERBACK, A., BOLLINGER, M. E., BUTZ, A., KANDASAMY, V. & ET, A. L. 2012. Asthma in Head Start children: effects of the Breathmobile program and family communication on asthma outcomes. <i>Journal of Allergy and Clinical Immunology</i> , 129, 664-670.                                                                 | Considered for outcome evaluation: Large number of children under five (mean age under 5)                                                                                                                    |
| Evans 2001      | EVANS, D., CLARK, N. M., LEVISON, M. J., LEVIN, B. & MELLINS, R. B. 2001. Can children teach their parents about asthma? <i>Health Education and Behavior</i> , 28, 500-511.                                                                                                                                                                             | Considered as a process and outcome evaluation study                                                                                                                                                         |
| Fernandes 2006  | FERNANDES, L., FONSECA, J. A., COSTA-PEREIRA, A., DELGADO, L., MARTINS, S., MOREIRA, A. & ET, A. L. 2006. Effect on quality of life of multidisciplinary psycho-educational group interventions a randomized controlled trial [Abstract]. <i>Journal of Allergy and Clinical Immunology</i> , 117, S139-S139.                                            | Considered for outcome evaluation: Large number outside of 5-18 year old target age range                                                                                                                    |
| Gardida 2002    | GARDIDA, A., ROJAS, M., TAVERA, C. & CATALAN, M. 2002. Evaluation of an educational program to control asthma in school age children in the Morelos state, Mexico. [Spanish]. <i>Revista del Instituto Nacional de Enfermedades Respiratorias</i> , 15, 27-30.                                                                                           | Considered for outcome evaluation: Not in English language                                                                                                                                                   |
| Gibson 1998     | GIBSON, P. G., SHAH, S. & MAMOON, H. A. 1998. Peer-led asthma education for adolescents: Impact evaluation. <i>Journal of Adolescent Health</i> , 22, 66-72.                                                                                                                                                                                             | Considered for outcome evaluation: Schools were not randomised and only two schools means that intervention and randomisation effect would conflate if they were randomised                                  |
| Gregory 2000    | GREGORY, E. K. 2000. Empowering students on medication for asthma to be active participants in their care: An exploratory study. <i>Journal of School Nursing</i> , 16, 20-27.                                                                                                                                                                           | Considered for outcome evaluation: Excluded on study design. Only two sites randomised - one school in each arm. Any intervention effect conflated with school effect.                                       |
| Halterman 2004  | HALTERMAN JILL S, S., SAUER, J. O. S. E. P. H., FAGNANO, M. A. R. I. A., MONTES, G. U. I. L. E. R. M. O., FISHER, S. U. S. A. N., TREMBLAY, P. A. U. L. & ET, A. L. 2012. Working toward a sustainable system of asthma care: development of the School-Based Preventive Asthma Care Technology (SB-PACT) trial. <i>Journal of Asthma</i> , 49, 395-400. | Considered for outcome evaluation: Excluded - not deemed to have a sufficient component of self-management                                                                                                   |
| Halterman 2011  | HALTERMAN, J. S., RIEKERT, K., BAYER, A., FAGNANO, M., TREMBLAY, P., BLAAKMAN, S. & ET, A. L. 2011a. A pilot study to enhance preventive asthma care among urban adolescents with asthma. <i>Journal of Asthma</i> , 48, 523-530.                                                                                                                        | Considered for outcome evaluation: Excluded – partly delivered in school and partly in the home – there is a substantial home component and not possible to disentangle which part may be driving any change |
| Halterman 2011a | HALTERMAN, J. S., SZILAGYI, P. G., FISHER, S. G., FAGNANO, M., TREMBLAY, P., CONN, K. M. & ET, A. L. 2011b. Randomized controlled trial to improve care for urban children with asthma results of the school-based asthma therapy trial. <i>Archives of Pediatrics and Adolescent Medicine</i> , 165, 262-268.                                           | Considered for outcome evaluation: Excluded as comparison received asthma care                                                                                                                               |
| Halterman 2012  | HALTERMAN, J. S., SZILAGYI, P. G., YOOS, H. L., CONN, K. M., KACZOROWSKI, J. M., HOLZHAUER, R. J. & ET, A. L. 2004. Benefits of a school-based asthma treatment program in the absence of secondhand smoke exposure: results of a                                                                                                                        | Considered for outcome evaluation: Excluded as comparison received asthma care                                                                                                                               |

|               |                                                                                                                                                                                                                                                                                                                                      |                                                                                                                                                                                              |
|---------------|--------------------------------------------------------------------------------------------------------------------------------------------------------------------------------------------------------------------------------------------------------------------------------------------------------------------------------------|----------------------------------------------------------------------------------------------------------------------------------------------------------------------------------------------|
|               | randomized clinical trial. <i>Archives of Pediatrics and Adolescent Medicine</i> , 158, 460-467.                                                                                                                                                                                                                                     |                                                                                                                                                                                              |
| Hill 1991     | HILL, R., WILLIAMS, J., BRITTON, J. & TATTERSFIELD, A. 1991. Can morbidity associated with untreated asthma in primary school children be reduced?: a controlled intervention study. <i>BMJ</i> , 303, 1169-1174.                                                                                                                    | Considered for outcome evaluation: Excluded as intervention did not foster self-management skills                                                                                            |
| Horner 1998   | HORNER, S. D. 1998. Using the Open Airways curriculum to improve self-care for third grade children with asthma. <i>Journal of School Health</i> , 68, 329-333.                                                                                                                                                                      | Considered for outcome evaluation: Exclude - study design not RCT                                                                                                                            |
| Horner 2003   | HORNER, S. D. 2003. Enhancing childrens' and parents' asthma management. <i>CRISP (Computer Retrieval of Information on Scientific Projects)</i> , 30/04/2007 End date, 1-1.                                                                                                                                                         | Considered for outcome evaluation: Study design was non-experimental                                                                                                                         |
| Joseph 2004   | JOSEPH, C. L., OWNBY, D. R., HAVSTAD, S. L., SALTZGABER, J., CONSIDINE, S., JOHNSON, D. & ET, A. L. 2013. Evaluation of a web-based asthma management intervention program for urban teenagers: reaching the hard to reach. <i>Journal of Adolescent Health</i> , 52, 419-426.                                                       | Considered for outcome evaluation: Not school based                                                                                                                                          |
| Joseph 2007   | JOSEPH, C. L., PETERSON, E., HAVSTAD, S., JOHNSON, C. C., HOERAUF, S., STRINGER, S. & ET, A. L. 2007. A web-based, tailored asthma management program for urban African-American high school students. <i>American Journal of Respiratory and Critical Care Medicine</i> , 175, 888-895.                                             | Considered for outcome evaluation (along with linked papers): Excluded as comparison included asthma education                                                                               |
| Joseph 2013a  | JOSEPH, V. 2004. A study compliance to two alternative drug regimens and the effect of health education on drug compliance in school age children with bronchial asthma. <i>Nursing Journal of India</i> , 95, 153-154.                                                                                                              | Considered for outcome evaluation (along with linked papers): Excluded as comparison included asthma education                                                                               |
| Khan 2014     | KHAN, R., MAHARAJ, R., SEERATTAN, N. & BABWAH, F. 2014. Effectiveness of personalized written asthma action plans in the management of children with partly controlled asthma in Trinidad: a randomized controlled trial. <i>Journal of Tropical Pediatrics</i> , 60, 17-26.                                                         | Considered for outcome evaluation: Excluded as not school-based                                                                                                                              |
| Kintner 2015  | KINTNER, E., COOK, G., MARTI C, N., STODDARD, D., GOMES, M., HARMON, P. & ET, A. L. 2015a. Comparative Effectiveness on Cognitive Asthma Outcomes of the SHARP Academic Asthma Health Education and Counseling Program and a Non-Academic Program. <i>Research in nursing &amp; health</i> , 38, 423-435.                            | Considered for outcome evaluation: Excluded on comparison as the control group received alternative asthma education                                                                         |
| Krishna 2006  | KRISHNA, S., BALAS, E. A., FRANCISCO, B. D. & KONIG, P. 2006. Effective and sustainable multimedia education for children with asthma: A randomized controlled trial. <i>Children's Health Care</i> , 35, 75-90.                                                                                                                     | Considered for outcome evaluation: Not deemed to be school-based                                                                                                                             |
| Lewis 2005    | LEWIS, C. J., THOMPSON, R. E., BUTZ, A. M., HILL, K. L., HUSS, K., LEWIS-BOWYER, L. L. & ET, A. L. 2005. Asthma education increases knowledge of rural parents and children with asthma and affects parents reports of their child's asthma symptoms [Abstract]. <i>Journal of Allergy and Clinical Immunology</i> , 115, S132-S132. | Considered for outcome evaluation: Study design included no randomisation                                                                                                                    |
| Marabini 2002 | MARABINI, A., BRUGNAMI, G., CURRADI, F., CASCIOLA, G., STOPPONI, R., PETTINARI, L. & ET, A. L. 2002. Short-term effectiveness of an asthma educational program: results of a randomized controlled trial. <i>Respiratory Medicine</i> , 96, 993-998.                                                                                 | Considered for outcome evaluation: Not focused on children (mean age approximately 50)                                                                                                       |
| Millard 2003  | MILLARD, M. W., JOHNSON, P. T., MCEWEN, M., NEATHERLIN, J., LAWRENCE, G., KENNERLY, D. K. & ET, A. L. 2003. A randomized controlled trial using the school for anti-inflammatory therapy in asthma. <i>Journal of Asthma</i> , 40, 769-776.                                                                                          | Considered for outcome and process evaluation: Not focused on self-management with educational activities aimed at parents; also did not contain the core components of a process evaluation |



|                       |                                                                                                                                                                                                                                                                                                                            |                                                                                                                                                                |
|-----------------------|----------------------------------------------------------------------------------------------------------------------------------------------------------------------------------------------------------------------------------------------------------------------------------------------------------------------------|----------------------------------------------------------------------------------------------------------------------------------------------------------------|
| NCT00217776           | NCT 2005. School-based approaches to help pre-teens manage asthma. <a href="http://clinicaltrials.gov/ct2/show/NCT00217776">clinicaltrials.gov/ct2/show/NCT00217776</a> .                                                                                                                                                  | Considered for outcome evaluation: Not an intervention study (trial protocol)                                                                                  |
| Perry 2000            | PERRY, C. S. & TOOLE, K. A. 2000. Impact of school nurse case management on asthma control in school-aged children. <i>Journal of School Health</i> , 70, 303-304.                                                                                                                                                         | Considered for outcome evaluation: Study design not considered to be an RCT                                                                                    |
| Salisbury 2002        | SALISBURY, C., FRANCIS, C., ROGERS, C., PARRY, K., THOMAS, H., CHADWICK, S. & ET, A. L. 2002. A randomised controlled trial of clinics in secondary schools for adolescents with asthma. <i>British Journal of General Practice</i> , 52, 988-996.                                                                         | Considered for outcome evaluation: Excluded as comparison group received additional intervention beyond usual care                                             |
| Shanovich 2009        | SHANOVICH, K. K., SORKNESS, C. A., WISE, M. E., PULVERMACHER, A. D., BHATTACHARYA, A. & GUSTAFSON, D. H. 2009. Internet telehealth for pediatric nurse case management improves asthma control [Abstract]. <i>Journal of Allergy and Clinical Immunology</i> , 123, S43-S43.                                               | Considered for outcome evaluation: Study design not judged to be an RCT                                                                                        |
| Sharek 2002           | SHAREK, P. J., MAYER, M. L., LOEWY, L., ROBINSON, T. N., SHAMES, R. S., UMETSU, D. T. & ET, A. L. 2002. Agreement among measures of asthma status: a prospective study of low-income children with moderate to severe asthma. <i>Pediatrics</i> , 110, 797-804.                                                            | Considered for outcome evaluation: Study not school-based                                                                                                      |
| Shegog 2001           | SHEGOG, R., BARTHOLOMEW, L. K., PARCEL, G. S., SOCKRIDER, M. M., MÄSSE, L. & ABRAMSON, S. L. 2001. Impact of a computer-assisted education program on factors related to asthma self-management behavior. <i>Journal of the American Medical Informatics Association</i> , 8, 49-61.                                       | Considered for outcome evaluation: Delivery of the intervention not contingent on schools (not school-based)                                                   |
| Terpstra 2012a        | TERPSTRA, J. L., CHAVEZ, L. J. & AYALA G, X. 2012. An intervention to increase caregiver support for asthma management in middle school-aged youth. <i>Journal of Asthma</i> , 49, 267-274.                                                                                                                                | Considered for outcome evaluation: Excluded on comparison as trial tested added impact on additional engagement with caregivers in an established intervention |
| Valery 2007           | VALERY, P. C., MASTERS, I. B., CLEMENTS, V., TAYLOR, B., LAIFOO, Y. & CHANG, A. B. 2007. A randomised controlled study on education intervention for childhood asthma by the Aboriginal and Torres Strait Islander health workers in Torres Strait region [Abstract]. <i>Medical Journal of Australia</i> , 12, A193-A193. | Considered for outcome evaluation: Intervention not school-based                                                                                               |
| Velsor-Friedrich 2004 | VELSOR-FRIEDRICH, B., MILITELLO, L. K., RICHARDS, M. H., HARRISON, P. R., GROSS, I. M., ROMERO, E. & ET, A. L. 2012. Effects of coping-skills training in low-income urban African-American adolescents with asthma. <i>Journal of Asthma</i> , 49, 372-379.                                                               | Considered for outcome evaluation: No randomisation described (not an RCT)                                                                                     |
| Velsor-Friedrich 2012 | VELSOR-FRIEDRICH, B., PIGOTT, T. D., LOULOUDIS, A. & VELSOR-FREIDRICH, B. 2004. The effects of a school-based intervention on the self-care and health of African-American inner-city children with asthma. <i>Journal of Pediatric Nursing</i> , 19, 247-256.                                                             | Considered for outcome evaluation: Excluded on comparison (study compared alternative asthma interventions)                                                    |
| Weng 2007             | WENG, H. C., YUAN, B. C., SU, Y. T., PERNG, D. S., CHEN, W. H., LIN, L. J. & ET, A. L. 2007. Effectiveness of a nurse-led management programme for paediatric asthma in Taiwan. <i>Journal of Paediatrics and Child Health</i> , 43, 134-138.                                                                              | Considered for outcome evaluation: Study design not deemed to be an RCT                                                                                        |
| Wensley 2004          | WENSLEY, D. & SILVERMAN, M. 2004. Peak flow monitoring for guided self-management in childhood asthma: a randomized controlled trial. <i>American Journal of Respiratory and Critical Care Medicine</i> , 170, 606-612.                                                                                                    | Considered for outcome evaluation: Not a school-based intervention                                                                                             |
| Whitman 1985          | WHITMAN, N., WEST, D., BROUGH, F. K. & WELCH, M. 1985. A study of a self-care rehabilitation program in pediatric asthma. <i>Health Education Quarterly</i> , 12, 333-342.                                                                                                                                                 | Considered for outcome evaluation: Published before cut-off date                                                                                               |

|           |                                                                                                                                                                                                      |                                                                                                                                                                      |
|-----------|------------------------------------------------------------------------------------------------------------------------------------------------------------------------------------------------------|----------------------------------------------------------------------------------------------------------------------------------------------------------------------|
| Yawn 2000 | YAWN, B. P., ALGATT-BERGSTROM, P. J., YAWN, R. A., WOLLAN, P., GRECO, M., GLEASON, M. & ET, A. L. 2000. An in-school CD-ROM asthma education program. <i>Journal of School Health</i> , 70, 153-159. | Considered for outcome evaluation: Not focused on asthmatic children; study did not report on outcomes for asthmatic children separately from non-asthmatic children |
|-----------|------------------------------------------------------------------------------------------------------------------------------------------------------------------------------------------------------|----------------------------------------------------------------------------------------------------------------------------------------------------------------------|
